# Supplementary material for: Validation of an algorithm to determine the primary care treatability of emergency department visits
Source: PubMed Central journal article supplement — BMJ Open. 2016 Aug 25;6(8):e011739. doi: 10.1136/bmjopen-2016-011739 (PMC5013457; doi:10.1136/bmjopen-2016-011739), 2016-08-25
Supplement: bmjopen-2016-011739supp2.pdf [file bmjopen-2016-011739supp2.pdf]

| hcpcs_cd | Category                                    | Short description                                                                               |
|----------|---------------------------------------------|-------------------------------------------------------------------------------------------------|
| J0150    | Drugs administered: antiarrhythmics         | Injection, Adenosine For Therapeutic Use, 6 Mg                                                  |
| J0282    | Drugs administered: antiarrhythmics         | Injection, Amiodarone Hydrochloride, 30 Mg                                                      |
| J0295    | Drugs administered: antibiotics             | Injection, Ampicillin Sodium/Sulbactam Sodium, Per 1.5 Gm                                       |
| J0456    | Drugs administered: antibiotics             | Injection, Azithromycin, 500 Mg                                                                 |
| J0744    | Drugs administered: antibiotics             | Injection, Ciprofloxacin For Intravenous Infusion, 200 Mg                                       |
| J2280    | Drugs administered: antibiotics             | Injection, Moxifloxacin, 100 Mg                                                                 |
| J2543    | Drugs administered: antibiotics             | Injection, Piperacillin Sodium/Tazobactam Sodium, 1 Gram/0.125 Grams (1.125                     |
| J1645    | Drugs administered: anticoagulants          | Injection, Dalteparin Sodium, Per 2500 Iu                                                       |
| J1650    | Drugs administered: anticoagulants          | Injection, Enoxaparin Sodium, 10 Mg                                                             |
| J0780    | Drugs administered: antiemetics             | Injection, Prochlorperazine, Up To 10 Mg                                                        |
| J1790    | Drugs administered: antiemetics             | Injection, Droperidol, Up To 5 Mg                                                               |
| J1170    | Drugs administered: opioid analgesics       | Injection, Hydromorphone, Up To 4 Mg                                                            |
| J2270    | Drugs administered: opioid analgesics       | Injection, Morphine Sulfate, Up To 10 Mg                                                        |
| J2275    | Drugs administered: opioid analgesics       | Injection, Morphine Sulfate (Preservative-Free Sterile Solution), Per 10 Mg                     |
| J3010    | Drugs administered: opioid analgesics       | Injection, Fentanyl Citrate, 0.1 Mg                                                             |
| J0171    | Drugs administered: other drug types        | Injection, Adrenalin, Epinephrine, 0.1 Mg                                                       |
| J0330    | Drugs administered: other drug types        | Injection, Succinylcholine Chloride, Up To 20 Mg                                                |
| J0360    | Drugs administered: other drug types        | Injection, Hydralazine Hcl, Up To 20 Mg                                                         |
| J1265    | Drugs administered: other drug types        | Injection, Dopamine Hcl, 40 Mg                                                                  |
| J1610    | Drugs administered: other drug types        | Injection, Glucagon Hydrochloride, Per 1 Mg                                                     |
| J1630    | Drugs administered: other drug types        | Injection, Haloperidol, Up To 5 Mg                                                              |
| J2310    | Drugs administered: other drug types        | Injection, Naloxone Hydrochloride, Per 1 Mg                                                     |
| J2370    | Drugs administered: other drug types        | Injection, Phenylephrine Hcl, Up To 1 Ml                                                        |
| J2710    | Drugs administered: other drug types        | Injection, Neostigmine Methylsulfate, Up To 0.5 Mg                                              |
| J2765    | Drugs administered: other drug types        | Injection, Metoclopramide Hcl, Up To 10 Mg                                                      |
| J3430    | Drugs administered: other drug types        | Injection, Phytonadione (Vitamin K), Per 1 Mg                                                   |
| 80100    | Laboratory tests                            | Drug Scr Qual Mlt Drug Classes Chrom Ea Px                                                      |
| 80196    | Laboratory tests                            | Salicylate                                                                                      |
| 82003    | Laboratory tests                            | Acetaminophen                                                                                   |
| 82009    | Laboratory tests                            | Acetone/Oth Ketone Bodies Serum Qual                                                            |
| 82010    | Laboratory tests                            | Acetone/Oth Ketone Bodies Serum Quan                                                            |
| 82140    | Laboratory tests                            | Ammonia                                                                                         |
| 82553    | Laboratory tests                            | Creatine Kinase Mb Fxj Only                                                                     |
| 82803    | Laboratory tests                            | Gases Bld Ph Calculated O2 Saturation                                                           |
| 82805    | Laboratory tests                            | Gases Bld Ph Dir Meas Xcpt Pls Oximtry                                                          |
| 83605    | Laboratory tests                            | Lactate                                                                                         |
| 83874    | Laboratory tests                            | Myoglobin                                                                                       |
| 84145    | Laboratory tests                            | Assay Of Procalcitonin                                                                          |
| 84484    | Laboratory tests                            | Troponin Quan                                                                                   |
| 84512    | Laboratory tests                            | Troponin Qual                                                                                   |
| 85378    | Laboratory tests                            | Fibrin Dgradj Produxs D-Dimer Qual/SemiQuan                                                     |
| 85379    | Laboratory tests                            | Fibrin Dgradj Produxs D-Dimer Quan                                                              |
| 85380    | Laboratory tests                            | Fibrin Dgradj Produxs D-Dimer Ultrsens                                                          |
| 90945    | Other diagnostic and therapeutic procedures | Dial Oth/Thn Hemo 1 Phys Eval                                                                   |
| L1830    | Other diagnostic and therapeutic procedures | Knee Orthosis, Immobilizer, Canvas Longitudinal, Prefabricated, Includes Fitting and Adjustment |
| 92950    | Other diagnostic and therapeutic procedures | Cardiopulm Resuscitation                                                                        |
| 31500    | Other diagnostic and therapeutic procedures | Intubation Endotracheal Emergency Procedure                                                     |
| 36430    | Other diagnostic and therapeutic procedures | Transfusion Bld/Bld Components                                                                  |
| 36556    | Other diagnostic and therapeutic procedures | Insj Non-Tun Ctr Cvc Age 5 Yr/>                                                                 |
| 36569    | Other diagnostic and therapeutic procedures | Insj Prph Cvc W/O Subq Port/Pmp Age 5 Yr/>                                                      |
| 43247    | Other diagnostic and therapeutic procedures | Stomach-Intestine Scope For Foreign Body Removal                                                |
| 49465    | Other diagnostic and therapeutic procedures | Contrast Injection Perq Radiologic Eval Gi Tube                                                 |
| 62270    | Other diagnostic and therapeutic procedures | Spi Pnrx Lmbr Dx                                                                                |
| G0257    | Other diagnostic and therapeutic procedures | Unscheduled Or Emergency Dialysis Treatment For An Esrd Patient In A Hospital                   |
| A9540    | Radiology and related                       | Technetium Tc-99M Macroaggregated Albumin, Diagnostic, Per Study Dose, Up To 10                 |
| A9558    | Radiology and related                       | Xenon Xe-133 Gas, Diagnostic, Per 10 Millicuries                                                |
| 70160    | Radiology and related                       | Radex Nsl B1S Compl Minimum 3 Views                                                             |
| 70450    | Radiology and related                       | Ct Head/Brn C-Matrl                                                                             |
| 70487    | Radiology and related                       | Ct Maxifcl Area C+ Matrl                                                                        |
| 70496    | Radiology and related                       | Ct Angiography Head W/Contrast/Noncontrast                                                      |
| 70498    | Radiology and related                       | Ct Angiography Neck W/Contrast/Noncontrast                                                      |
| 70549    | Radiology and related                       | Mra Nck C-/C+                                                                                   |
| 71010    | Radiology and related                       | Radex Ch 1 View Frnt                                                                            |
| 71275    | Radiology and related                       | Ct Angiography Chest W/Contrast/Noncontrast                                                     |
| 72125    | Radiology and related                       | Ct Crv Spi C-Matrl                                                                              |
| 74010    | Radiology and related                       | Radex Abd Anterpost&Addl Oblq&Cone Views                                                        |
| 74022    | Radiology and related                       | Radex Abd Compl Aqt Abd W/S/E/D Views 1 View Ch                                                 |
| 78582    | Radiology and related                       | Pulmonary Ventilation (Eg, Aerosol Or Gas) And Perfusion Imaging                                |
| 78585    | Radiology and related                       | Pulm Pi Part Vntj Rbrthing&Wshot +1 Brth                                                        |
| 78588    | Radiology and related                       | Pulm Pi Part Vntj Img Aersl 1/Mlt Prjcg                                                         |
| Q9963    | Radiology and related                       | High Osmolar Contrast Material, 350-399 Mg/MI Iodine Concentration, Per MI                      |
| Q9965    | Radiology and related                       | Low Osmolar Contrast Material, 100-199 Mg/MI Iodine Concentration, Per MI                       |

| hcpcs_cd | Category                                | Short description                                |
|----------|-----------------------------------------|--------------------------------------------------|
| 94002    | Respiratory services                    | Ventilation Assist & Mgmt Inpatient 1St Day      |
| 94644    | Respiratory services                    | Continuous Inhalation Treatment 1St Hr           |
| 94660    | Respiratory services                    | Cpap Vntj Cpap Initiation&Mgmt                   |
| 21800    | Treatment of fractures and dislocations | Closed Tx Rib Fracture Uncomplicated Each        |
| 23650    | Treatment of fractures and dislocations | Clsd Tx Shoulder Dislc W/Manipulation W/O Anes   |
| 25605    | Treatment of fractures and dislocations | Cltx Dstl Rdl Fx/Epiphysl Sep +-W/Mnpj           |
| 27265    | Treatment of fractures and dislocations | Cltx Post Hip Arthrp Dislc W/O Anes              |
| 29505    | Treatment of fractures and dislocations | Application Long Leg Splint Thigh Ankle/Toes     |
| 12004    | Wound repair/suturing                   | Simple Rpr Scalp/Neck/Ax/Genit/Trunk 7.6-12.5Cm  |
| 12005    | Wound repair/suturing                   | Smpl Rpr Scalp/Neck/Ax/Genit/Trunk 12.6-20.0Cm   |
| 12006    | Wound repair/suturing                   | Smpl Rpr Scalp/Neck/Ax/Genit/Trunk 20.1-30.0Cm   |
| 12007    | Wound repair/suturing                   | Simple Repair Scalp/Neck/Ax/Genit/Trunk >30.0Cm  |
| 12011    | Wound repair/suturing                   | Simple Repair F/E/E/N/L/M 2.5Cm/<                |
| 12013    | Wound repair/suturing                   | Simple Repair F/E/E/N/L/M 2.6Cm-5.0Cm            |
| 12014    | Wound repair/suturing                   | Simple Repair F/E/E/N/L/M 5.1Cm-7.5Cm            |
| 12015    | Wound repair/suturing                   | Simple Repair F/E/E/N/L/M 7.6Cm-12.5Cm           |
| 12016    | Wound repair/suturing                   | Simple Repair F/E/E/N/L/M 12.6Cm-20.0Cm          |
| 12017    | Wound repair/suturing                   | Simple Repair F/E/E/N/L/M 20.1Cm-30.0Cm          |
| 12018    | Wound repair/suturing                   | Simple Repair F/E/E/N/L/M >30.0Cm                |
| 12034    | Wound repair/suturing                   | Repair Intermediate S/A/T/E 7.6-12.5 Cm          |
| 12035    | Wound repair/suturing                   | Repair Intermediate S/A/T/E 12.6-20.0Cm          |
| 12036    | Wound repair/suturing                   | Repair Intermediate S/A/T/E 20.1-30.0 Cm         |
| 12037    | Wound repair/suturing                   | Repair Intermediate S/A/T/E > 30.0 Cm            |
| 12044    | Wound repair/suturing                   | Repair Intermediate N/H/F/Xtrnl Gent 7.6-12.5Cm  |
| 12045    | Wound repair/suturing                   | Repair Intermediate N/H/F/Xtrnl Gent 12.6-20 Cm  |
| 12046    | Wound repair/suturing                   | Rpr Intermediate N/H/F/Xtrnl Gent 20.1-30.0 Cm   |
| 12047    | Wound repair/suturing                   | Repair Intermediate N/H/F/Xtrnl Gent >30.0 Cm    |
| 12051    | Wound repair/suturing                   | Repair Intermediate F/E/E/N/L/M&/Muc 2.5 Cm/<    |
| 12052    | Wound repair/suturing                   | Repair Intermediate F/E/E/N/L/M&/Muc 2.6-5.0 Cm  |
| 12053    | Wound repair/suturing                   | Repair Intermediate F/E/E/N/L/M&/Muc 5.1-7.5 Cm  |
| 12054    | Wound repair/suturing                   | Repair Intermediate F/E/E/N/L/M&/Muc 7.6-12.5 Cm |
| 12055    | Wound repair/suturing                   | Repair Intermediate F/E/E/N/L/M&/Muc 12.6-20.0Cm |
| 12056    | Wound repair/suturing                   | Repair Intermediate F/E/E/N/L/M&/Muc 20.1-30.0Cm |
| 12057    | Wound repair/suturing                   | Repair Intermediate F/E/E/N/L/M&/Muc > 30.0 Cm   |
| 13100    | Wound repair/suturing                   | Repair Complex Trunk 1.1 Cm-2.5 Cm               |
| 13101    | Wound repair/suturing                   | Repair Complex Trunk 2.6 Cm-7.5 Cm               |
| 13102    | Wound repair/suturing                   | Repair Complex Trunk Ea 5 Cm/<                   |
| 13120    | Wound repair/suturing                   | Repair Complex Scalp/Arm/Leg 1.1 Cm-2.5 Cm       |
| 13121    | Wound repair/suturing                   | Repair Complex Scalp/Arm/Leg 2.6 Cm-7.5 Cm       |
| 13122    | Wound repair/suturing                   | Repair Complex Scalp/Arm/Leg Ea 5 Cm/<           |
| 13131    | Wound repair/suturing                   | Repair Complex F/C/C/M/N/Ax/G/H/F 1.1 Cm-2.5 Cm  |
| 13132    | Wound repair/suturing                   | Repair Complex F/C/C/M/N/Ax/G/H/F 2.6 Cm-7.5 Cm  |
| 13133    | Wound repair/suturing                   | Repair Complex F/C/C/M/N/Ax/G/H/F Ea 5 Cm/<      |
| 13150    | Wound repair/suturing                   | Repair Complex Eyelid/Nose/Ear/Lip 1.0 Cm/<      |
| 13151    | Wound repair/suturing                   | Repair Complex Eyelid/Nose/Ear/Lip 1.1-2.5 Cm    |
| 13152    | Wound repair/suturing                   | Repair Complex Eyelid/Nose/Ear/Lip 2.6-7.5 Cm    |
| 13153    | Wound repair/suturing                   | Repair Complex Eyelid/Nose/Ear/Lip Ea 5 Cm/<     |
| G0168    | Wound repair/suturing                   | Wound Closure Utilizing Tissue Adhesive Only     |
