# Supplementary figures and images for: Validation of an algorithm to determine the primary care treatability of emergency department visits
Source: PubMed Central journal article supplement — BMJ Open. 2016 Aug 25;6(8):e011739. doi: 10.1136/bmjopen-2016-011739 (PMC5013457; doi:10.1136/bmjopen-2016-011739), 2016-08-25

Note:  $n_b$  refers to the number of unique beneficiaries;  
 $n_v$  refers to the number of unique ED visits

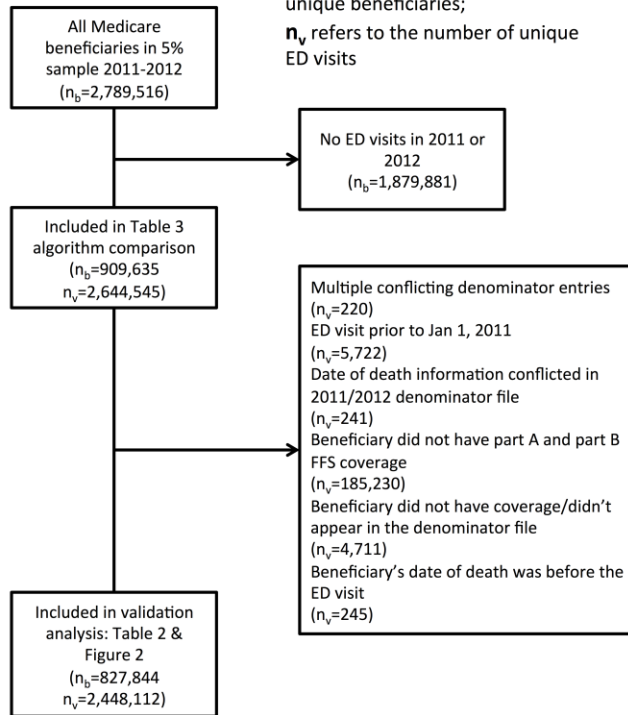

Supplement: bmjopen-2016-011739supp1.pdf [file bmjopen-2016-011739supp1.pdf]
